# Supplementary material for: Early warning scoring systems versus standard observations charts for wards in South Africa: a cluster randomized controlled trial
Source: PubMed Central journal article supplement (PMC4374204; doi:10.1186/s13063-015-0624-2), 2015-03-20
Supplement: 13063_2015_624_MOESM4_ESM.pdf [file 13063_2015_624_MOESM4_ESM.pdf]

**SCORING KEY for single MEWS**

**MODIFIED EARLY WARNING SCORING (MEWS) VITAL SIGNS CHART**

|           |                                                  |                                                        |                                                                  |
|-----------|--------------------------------------------------|--------------------------------------------------------|------------------------------------------------------------------|
| <b>0</b>  | <b>1</b>                                         | <b>2</b>                                               | <b>3</b>                                                         |
| No action | Re-check after 1/2 hour/report if no improvement | Check after 5 min/report immediately if no improvement | Single RED score of 3 = Medium risk but still report immediately |

**SCORING KEY for TOTAL MEWS**

|                                |                                                 |                                |                                                        |                                          |                    |
|--------------------------------|-------------------------------------------------|--------------------------------|--------------------------------------------------------|------------------------------------------|--------------------|
| <b>0, Total 1-4 = Low risk</b> | Re-check after 1/2 hr /report if no improvement | <b>Total 5-6 = Medium risk</b> | Check after 5 min/report immediately if no improvement | <b>Total score 7 or more = High risk</b> | Report immediately |
|--------------------------------|-------------------------------------------------|--------------------------------|--------------------------------------------------------|------------------------------------------|--------------------|

|                                                    |  |  |  |  |  |  |  |  |  |
|----------------------------------------------------|--|--|--|--|--|--|--|--|--|
| PATIENTS' NORMAL BP                                |  |  |  |  |  |  |  |  |  |
| PATIENT'S IDENTIFICATION & HOSPITAL NUMBER STICKER |  |  |  |  |  |  |  |  |  |

|                    |  |  |  |  |  |  |  |  |  |
|--------------------|--|--|--|--|--|--|--|--|--|
| POST-OPERATIVE DAY |  |  |  |  |  |  |  |  |  |
| DATE               |  |  |  |  |  |  |  |  |  |
| TIME               |  |  |  |  |  |  |  |  |  |

|                                                                           |                          |   |  |  |  |  |  |  |  |   |                          |
|---------------------------------------------------------------------------|--------------------------|---|--|--|--|--|--|--|--|---|--------------------------|
| <b>RESPIRATORY RATE</b><br>Write in full if outside the range eg. 7 or 26 | 25 or more               | 3 |  |  |  |  |  |  |  | 3 | 25 or more               |
|                                                                           | 21-24                    | 2 |  |  |  |  |  |  |  | 2 | 21-24                    |
|                                                                           | 12-20                    | 0 |  |  |  |  |  |  |  | 0 | 12-20                    |
|                                                                           | 9-11                     | 1 |  |  |  |  |  |  |  | 1 | 9-11                     |
|                                                                           | ≤8                       | 3 |  |  |  |  |  |  |  | 3 | ≤8                       |
| <b>O<sub>2</sub> Saturation %</b>                                         | 96+                      | 0 |  |  |  |  |  |  |  | 0 | 96+                      |
|                                                                           | 94-95                    | 1 |  |  |  |  |  |  |  | 1 | 94-95                    |
|                                                                           | 92-93                    | 2 |  |  |  |  |  |  |  | 2 | 92-93                    |
|                                                                           | 91 or less               | 3 |  |  |  |  |  |  |  | 3 | 91 or less               |
| <b>Inspired O<sub>2</sub></b>                                             | YES % / NO               |   |  |  |  |  |  |  |  |   | YES % / NO               |
| <b>Temperature °C</b><br>Write in full if outside the range eg.           | 39.1 or higher           | 2 |  |  |  |  |  |  |  | 2 | 39.1 or higher           |
|                                                                           | 38.1-39.0                | 1 |  |  |  |  |  |  |  | 1 | 38.1-39.0                |
|                                                                           | 36.1-38.0                | 0 |  |  |  |  |  |  |  | 0 | 36.1-38.0                |
|                                                                           | 35.1-36.0                | 1 |  |  |  |  |  |  |  | 1 | 35.1-36.0                |
|                                                                           | 35 or lower              | 3 |  |  |  |  |  |  |  | 3 | 35 or lower              |
| <b>HEART RATE</b><br>Write in full if outside the range eg. 39 or 132     | 131 or more              | 3 |  |  |  |  |  |  |  | 3 | 131 or more              |
|                                                                           | 111-130                  | 2 |  |  |  |  |  |  |  | 2 | 111-130                  |
|                                                                           | 91-110                   | 1 |  |  |  |  |  |  |  | 1 | 91-110                   |
|                                                                           | 51-90                    | 0 |  |  |  |  |  |  |  | 0 | 51-90                    |
|                                                                           | 41-50                    | 1 |  |  |  |  |  |  |  | 1 | 41-50                    |
|                                                                           | 40 or less               | 3 |  |  |  |  |  |  |  | 3 | 40 or less               |
| <b>SYSTOLIC BP</b><br>Write in full if outside the range eg. 90 or 221    | 220 or more              | 3 |  |  |  |  |  |  |  | 3 | 220 or more              |
|                                                                           | 111-219                  | 0 |  |  |  |  |  |  |  | 0 | 111-219                  |
|                                                                           | 101-110                  | 1 |  |  |  |  |  |  |  | 1 | 101-110                  |
|                                                                           | 91-100                   | 2 |  |  |  |  |  |  |  | 2 | 91-100                   |
|                                                                           | 90 or less               | 3 |  |  |  |  |  |  |  | 3 | 90 or less               |
| <b>DIASTOLIC BP</b> write in full eg. 80                                  |                          |   |  |  |  |  |  |  |  |   |                          |
| <b>PERFUSION</b> - capillary refill <2 sec                                |                          |   |  |  |  |  |  |  |  |   | Perfusion                |
| <b>SKIN COLOUR</b>                                                        | Pale/Cyanotic            |   |  |  |  |  |  |  |  |   | Pale/Cyanotic            |
| <b>PAIN</b>                                                               | Severe                   | 3 |  |  |  |  |  |  |  |   | Pain 3                   |
|                                                                           | Moderate                 | 2 |  |  |  |  |  |  |  |   | 2                        |
|                                                                           | Mild                     | 1 |  |  |  |  |  |  |  |   | 1                        |
|                                                                           | No pain                  | 0 |  |  |  |  |  |  |  |   | 0                        |
| <b>HAD PAIN MEDICATION</b>                                                | YES/NO                   |   |  |  |  |  |  |  |  |   | YES/NO                   |
| <b>Sweating</b>                                                           | YES/NO                   |   |  |  |  |  |  |  |  |   | YES/NO                   |
| <b>Wound oozing</b>                                                       | YES/NO                   |   |  |  |  |  |  |  |  |   | YES/NO                   |
| <b>Other: write</b>                                                       |                          |   |  |  |  |  |  |  |  |   |                          |
| <b>Pedal pulses</b>                                                       | YES/NO                   |   |  |  |  |  |  |  |  |   | YES/NO                   |
| <b>Blood glucose</b>                                                      |                          |   |  |  |  |  |  |  |  |   |                          |
| <b>Finger prick Hb</b>                                                    |                          |   |  |  |  |  |  |  |  |   |                          |
| <b>LEVEL OF CONSCIOUSNESS</b>                                             |                          |   |  |  |  |  |  |  |  |   |                          |
| Alert (A)                                                                 | (GCS 15)                 | 0 |  |  |  |  |  |  |  | 0 | A                        |
| Reacting to voice (V) / Pain (P) / Unresponsive (U)                       | (GCS 14 or less)         | 3 |  |  |  |  |  |  |  | 3 | V/P/U                    |
| <b>Pupil size:</b>                                                        |                          |   |  |  |  |  |  |  |  |   |                          |
| Right                                                                     | Size                     |   |  |  |  |  |  |  |  |   | Right: Size              |
|                                                                           | Reaction                 |   |  |  |  |  |  |  |  |   | Reaction                 |
| Left                                                                      | Size                     |   |  |  |  |  |  |  |  |   | Left: Size               |
|                                                                           | Reaction                 |   |  |  |  |  |  |  |  |   | Reaction                 |
| <b>Intravenous fluid</b>                                                  | YES/NO                   |   |  |  |  |  |  |  |  |   | IV YES/NO                |
| <b>URINE OUTPUT</b><br>[Indicate if normally anuric]<br>C=Catheter        | more than 300ml/hr for 2 | 1 |  |  |  |  |  |  |  | 1 | more than 300ml/hr for 2 |
|                                                                           | 60ml/hr                  | 0 |  |  |  |  |  |  |  | 0 | 60ml/hr                  |
|                                                                           | less than 60ml/hr        | 1 |  |  |  |  |  |  |  | 1 | less than 60ml/hr        |
|                                                                           | less than 30ml/hr        | 2 |  |  |  |  |  |  |  | 2 | less than 30ml/hr        |
|                                                                           | No output                | 3 |  |  |  |  |  |  |  | 3 | No output                |
| <b>Looks unwell</b>                                                       | YES/NO                   |   |  |  |  |  |  |  |  |   | YES/NO                   |
| <b>TOTAL SCORE</b>                                                        |                          |   |  |  |  |  |  |  |  |   | <b>TOTAL SCORE</b>       |
| <b>Initials</b>                                                           |                          |   |  |  |  |  |  |  |  |   |                          |

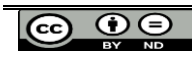

This document by Una Kyriacos (Ph.D. RN, UCT Division of Nursing & Midwifery, 2014) is licensed under the Creative Commons Attribution-NonCommercial-ShareAlike 4.0 International Licence. The licence can be viewed at <http://creativecommons.org/licenses/by-nc-sa/4.0/>. This work was inspired by the Royal College of Physicians' National Early Warning Score (NEWS) 2012.
